# Supplementary material for: Use of alternative and complementary therapies in labor and delivery care: a cross-sectional study of midwives’ training in Catalan hospitals accredited as centers for normal birth
Source: PubMed Central journal article supplement (PMC4225673; doi:10.1186/1472-6882-13-318), 2013-11-15
Supplement: 1472-6882-13-318-S1.pdf [file 1472-6882-13-318-S1.pdf]

## **Additional files**

### **Additional file 1 – QUESTIONNAIRE FOR MIDWIVES:**

#### **Personal and professional Data:**

Gender:  male  female

Age: \_\_\_\_\_ years

Place where you studied midwifery specialty: \_\_\_\_\_

At what year did you end your training? \_\_\_\_\_

How long have you worked in this hospital? \_\_\_\_\_ years

How long have you work in natural birth? \_\_\_\_\_ years

**Training in complementary and alternative therapies:**

|                                                    | Duration | During nurse training |    | Before nurse training |    | Continuous training |    | Years of experience |
|----------------------------------------------------|----------|-----------------------|----|-----------------------|----|---------------------|----|---------------------|
|                                                    |          | Yes                   | No | Yes                   | No | Yes                 | No |                     |
| Training in:                                       | N° hours |                       |    |                       |    |                     |    |                     |
| <b>NATURAL PRODUCTS:</b>                           |          |                       |    |                       |    |                     |    |                     |
| Phytotherapy                                       |          |                       |    |                       |    |                     |    |                     |
| Bach remedies                                      |          |                       |    |                       |    |                     |    |                     |
| Orthomolecular medicine                            |          |                       |    |                       |    |                     |    |                     |
| <b>MIND-BODY MEDICINE:</b>                         |          |                       |    |                       |    |                     |    |                     |
| Continued support                                  |          |                       |    |                       |    |                     |    |                     |
| Hydrotherapy                                       |          |                       |    |                       |    |                     |    |                     |
| Hypnosis                                           |          |                       |    |                       |    |                     |    |                     |
| Music therapy                                      |          |                       |    |                       |    |                     |    |                     |
| Relaxation techniques                              |          |                       |    |                       |    |                     |    |                     |
| Deep-breathing exercises                           |          |                       |    |                       |    |                     |    |                     |
| Guided imagery                                     |          |                       |    |                       |    |                     |    |                     |
| Postural therapy                                   |          |                       |    |                       |    |                     |    |                     |
| Yoga                                               |          |                       |    |                       |    |                     |    |                     |
| <b>WHOLE MEDICAL SYSTEMS:</b>                      |          |                       |    |                       |    |                     |    |                     |
| Acupuncture                                        |          |                       |    |                       |    |                     |    |                     |
| Aromatherapy                                       |          |                       |    |                       |    |                     |    |                     |
| Ear puncture                                       |          |                       |    |                       |    |                     |    |                     |
| Homeopathy                                         |          |                       |    |                       |    |                     |    |                     |
| <b>MANIPULATIVE AND BODY-BASED PRACTICES:</b>      |          |                       |    |                       |    |                     |    |                     |
| Acupressure                                        |          |                       |    |                       |    |                     |    |                     |
| Perineum compresses                                |          |                       |    |                       |    |                     |    |                     |
| Transcutaneous electrical nerve stimulation (TENS) |          |                       |    |                       |    |                     |    |                     |
| Sterile water injection                            |          |                       |    |                       |    |                     |    |                     |
| Massage                                            |          |                       |    |                       |    |                     |    |                     |
| Reflex therapy                                     |          |                       |    |                       |    |                     |    |                     |
| Shiatsu                                            |          |                       |    |                       |    |                     |    |                     |
| <b>ENERGETIC THERAPYES:</b>                        |          |                       |    |                       |    |                     |    |                     |
| Reiki                                              |          |                       |    |                       |    |                     |    |                     |
| Therapeutic touch                                  |          |                       |    |                       |    |                     |    |                     |
| Others:                                            |          |                       |    |                       |    |                     |    |                     |

## Use of therapies during labour:

Mark with X your opinion for every therapy indication, next, tell us your opinion on their usefulness from 1 (useless) to 5 (very useful).

| Use of therapies             | Number of women | Indications                                               | Use utility  |          |              |             |           |
|------------------------------|-----------------|-----------------------------------------------------------|--------------|----------|--------------|-------------|-----------|
|                              |                 |                                                           | 1<br>nothing | 2<br>any | 3<br>regular | 4<br>rather | 5<br>much |
| <b>NATURALS PRODUCTS:</b>    |                 |                                                           |              |          |              |             |           |
| Phitotherapy                 |                 | <input type="checkbox"/> stimulation uterine contractions |              |          |              |             |           |
|                              |                 | <input type="checkbox"/> promote cervical dilation        |              |          |              |             |           |
|                              |                 | <input type="checkbox"/> others: .....                    |              |          |              |             |           |
| Bach remedies                |                 | <input type="checkbox"/> reduce fears                     |              |          |              |             |           |
|                              |                 | <input type="checkbox"/> reduce anxiety                   |              |          |              |             |           |
|                              |                 | <input type="checkbox"/> improve foetus wellbeing         |              |          |              |             |           |
|                              |                 | <input type="checkbox"/> reduce discouragement            |              |          |              |             |           |
|                              |                 | <input type="checkbox"/> others: .....                    |              |          |              |             |           |
| Orthomolecular medicine      |                 | <input type="checkbox"/> stimulation uterine contractions |              |          |              |             |           |
|                              |                 | <input type="checkbox"/> others: .....                    |              |          |              |             |           |
| <b>MIND-BODY MEDICINE:</b>   |                 |                                                           |              |          |              |             |           |
| Continued support            |                 | <input type="checkbox"/> reduce anxiety                   |              |          |              |             |           |
|                              |                 | <input type="checkbox"/> others: .....                    |              |          |              |             |           |
| Hydrotherapy                 |                 | <input type="checkbox"/> pain relief                      |              |          |              |             |           |
|                              |                 | <input type="checkbox"/> promote cervical dilation        |              |          |              |             |           |
|                              |                 | <input type="checkbox"/> others: .....                    |              |          |              |             |           |
| Hypnosis                     |                 | <input type="checkbox"/> pain relief                      |              |          |              |             |           |
|                              |                 | <input type="checkbox"/> others: .....                    |              |          |              |             |           |
| Music therapy                |                 | <input type="checkbox"/> promote relaxation               |              |          |              |             |           |
|                              |                 | <input type="checkbox"/> improve concentration            |              |          |              |             |           |
|                              |                 | <input type="checkbox"/> others: .....                    |              |          |              |             |           |
| Relaxation techniques        |                 | <input type="checkbox"/> pain relief                      |              |          |              |             |           |
|                              |                 | <input type="checkbox"/> others: .....                    |              |          |              |             |           |
| Deep-breathing exercises     |                 | <input type="checkbox"/> pain relief                      |              |          |              |             |           |
|                              |                 | <input type="checkbox"/> others: .....                    |              |          |              |             |           |
| Guided imagery               |                 | <input type="checkbox"/> pain relief                      |              |          |              |             |           |
|                              |                 | <input type="checkbox"/> others: .....                    |              |          |              |             |           |
| Postural therapy             |                 | <input type="checkbox"/> pain relief                      |              |          |              |             |           |
|                              |                 | <input type="checkbox"/> promote cervical dilation        |              |          |              |             |           |
|                              |                 | <input type="checkbox"/> change foetus presentation       |              |          |              |             |           |
| Yoga                         |                 | <input type="checkbox"/> promote relaxation               |              |          |              |             |           |
|                              |                 | <input type="checkbox"/> improve concentration            |              |          |              |             |           |
|                              |                 | <input type="checkbox"/> others: .....                    |              |          |              |             |           |
| <b>WHOLE MEDICAL SYSTEMS</b> |                 |                                                           |              |          |              |             |           |
| Acupuncture/ Ear puncture    |                 | <input type="checkbox"/> pain relief                      |              |          |              |             |           |
|                              |                 | <input type="checkbox"/> stimulation uterine contractions |              |          |              |             |           |
|                              |                 | <input type="checkbox"/> promote cervical dilation        |              |          |              |             |           |
|                              |                 | <input type="checkbox"/> others: .....                    |              |          |              |             |           |
| Aromatherapy                 |                 | <input type="checkbox"/> stimulation uterine contractions |              |          |              |             |           |
|                              |                 | <input type="checkbox"/> reduce anxiety                   |              |          |              |             |           |
|                              |                 | <input type="checkbox"/> others: .....                    |              |          |              |             |           |
| Homeopathy                   |                 | <input type="checkbox"/> stimulation uterine contractions |              |          |              |             |           |
|                              |                 | <input type="checkbox"/> others: .....                    |              |          |              |             |           |

| MANIPULATIVE AND BODY-BASED PRACTICES |  |                                                           |  |  |  |  |  |
|---------------------------------------|--|-----------------------------------------------------------|--|--|--|--|--|
| Perineum compress                     |  | <input type="checkbox"/> pain relief                      |  |  |  |  |  |
|                                       |  | <input type="checkbox"/> reduce perineum trauma           |  |  |  |  |  |
| Transcutaneous nerve stimulation      |  | <input type="checkbox"/> pain relief                      |  |  |  |  |  |
| Sterile water injections              |  | <input type="checkbox"/> pain relief                      |  |  |  |  |  |
| Massage                               |  | <input type="checkbox"/> pain relief                      |  |  |  |  |  |
|                                       |  | <input type="checkbox"/> reduce anxiety                   |  |  |  |  |  |
|                                       |  | <input type="checkbox"/> others: .....                    |  |  |  |  |  |
| Reflex therapy                        |  | <input type="checkbox"/> stimulation uterine contractions |  |  |  |  |  |
|                                       |  | <input type="checkbox"/> others: .....                    |  |  |  |  |  |
| ENERGETIC THERAPIES                   |  |                                                           |  |  |  |  |  |
| Reiki                                 |  | <input type="checkbox"/> reduce anxiety                   |  |  |  |  |  |
|                                       |  | <input type="checkbox"/> others: .....                    |  |  |  |  |  |
| Therapeutic touch                     |  | <input type="checkbox"/> reduce anxiety                   |  |  |  |  |  |
|                                       |  | <input type="checkbox"/> others: .....                    |  |  |  |  |  |
| other: .....                          |  | <input type="checkbox"/> .....                            |  |  |  |  |  |
|                                       |  | <input type="checkbox"/> .....                            |  |  |  |  |  |

**Additional file 2 –QUESTIONNAIRE FOR NURSING SUPERVISORS ON THE LABOUR  
WARDS.**

**Personal and professional Data**

Gender:  Male  Female

Age: \_\_\_\_\_ years

Professional Category: \_\_\_\_\_

How long have you been working in this labour area? \_\_\_\_\_

Currently do you assist labours? \_\_\_\_\_

Number of parts of the hospital during 2011: \_\_\_\_\_

Number of parts for normal birth in 2011: \_\_\_\_\_

**Hospital resources**

| <b>Hospital resources:</b>              | Yes | No |
|-----------------------------------------|-----|----|
| Acupuncture needles                     |     |    |
| Bath                                    |     |    |
| Hot water bottles                       |     |    |
| Perineum compresses                     |     |    |
| Shower                                  |     |    |
| Transcutaneous nerve stimulation (TENS) |     |    |
| Phytotherapy                            |     |    |
| Bach Remedies                           |     |    |
| Homeopathy                              |     |    |
| Sterile water injections                |     |    |
| Birthing bed                            |     |    |
| Orthomolecular medicine                 |     |    |
| Massage oils                            |     |    |
| Essential Oils                          |     |    |
| Balls                                   |     |    |
| Radio or CD for music therapy           |     |    |
| Other (specify): .....                  |     |    |
|                                         |     |    |
